# Supplementary material
Source: PubMed Central journal article supplement (PMC4568511)
Supplement: supp_tpc.15.00523_TPC2015-00523-RAR1_Supplemental_Data_pdf.pdf [file supp_tpc.15.00523_TPC2015-00523-RAR1_Supplemental_Data_pdf.pdf]

**Small RNA derived from the virulence modulating region of the *Potato spindle tuber viroid* silences *callose synthase* genes of tomato plants**

Charith Raj Adkar-Purushothama <sup>1</sup>, Chantal Brosseau <sup>2</sup>, Tamara Giguère <sup>1</sup>,  
Teruo Sano <sup>3</sup>, Peter Moffett <sup>2</sup> and Jean-Pierre Perreault <sup>1\*</sup>

<sup>1</sup> RNA Group/Groupe ARN, Département de Biochimie, Faculté de médecine des sciences de la santé, Pavillon de Recherche Appliquée au Cancer, Université de Sherbrooke, 3201 rue Jean-Mignault, Sherbrooke, Québec, J1E 4K8, Canada

<sup>2</sup> Centre SÈVE, Département de Biologie, Université de Sherbrooke, 2500 Boulevard de l'Université Sherbrooke, Québec, J1K 2R1, Canada.

<sup>3</sup> Faculty of Agriculture and Life Science, Hirosaki University, Bunkyo-cho 3, Hirosaki 036-8561, Japan

Submitted 30<sup>th</sup> December, 2014

Resubmitted 10<sup>th</sup> June, 2015

Final submission 22<sup>nd</sup> July, 2015

**Running title** RNA silencing of *Ca/S* genes by PSTVd

\*Corresponding author

E-mail: Jean-Pierre.Perreault@USherbrooke.ca

The author responsible for the distribution of the materials integral to the findings presented in this article, in accordance with the policy described in the Instructions for Authors ([www.plantcell.org](http://www.plantcell.org)) is: J.P. Perreault (Jean-Pierre.Perreault@USherbrooke.ca).

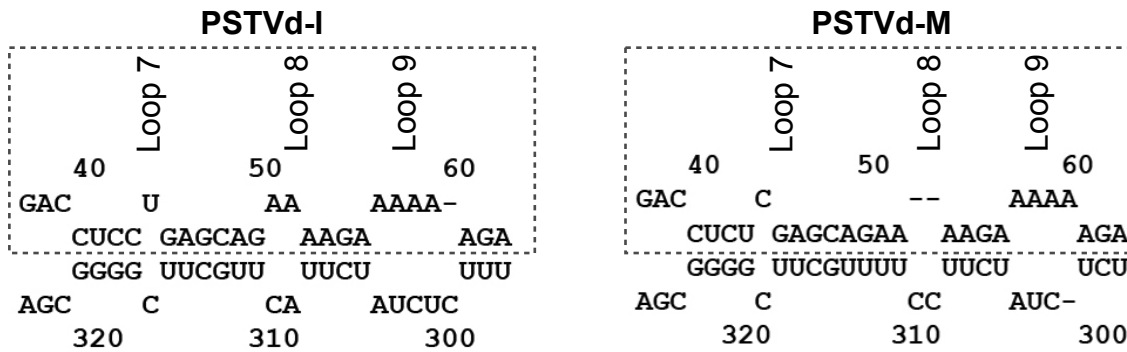

**Supplemental Figure 1.** Thermodynamically predicted secondary structure of PSTVd variants.

Thermodynamically predicted secondary structure of PSTVd-I and PSTVd-M by mfold (Zuker, 2003). The structures at the VMRs are shown for comparison. The boxed region indicates the VMR sequence.

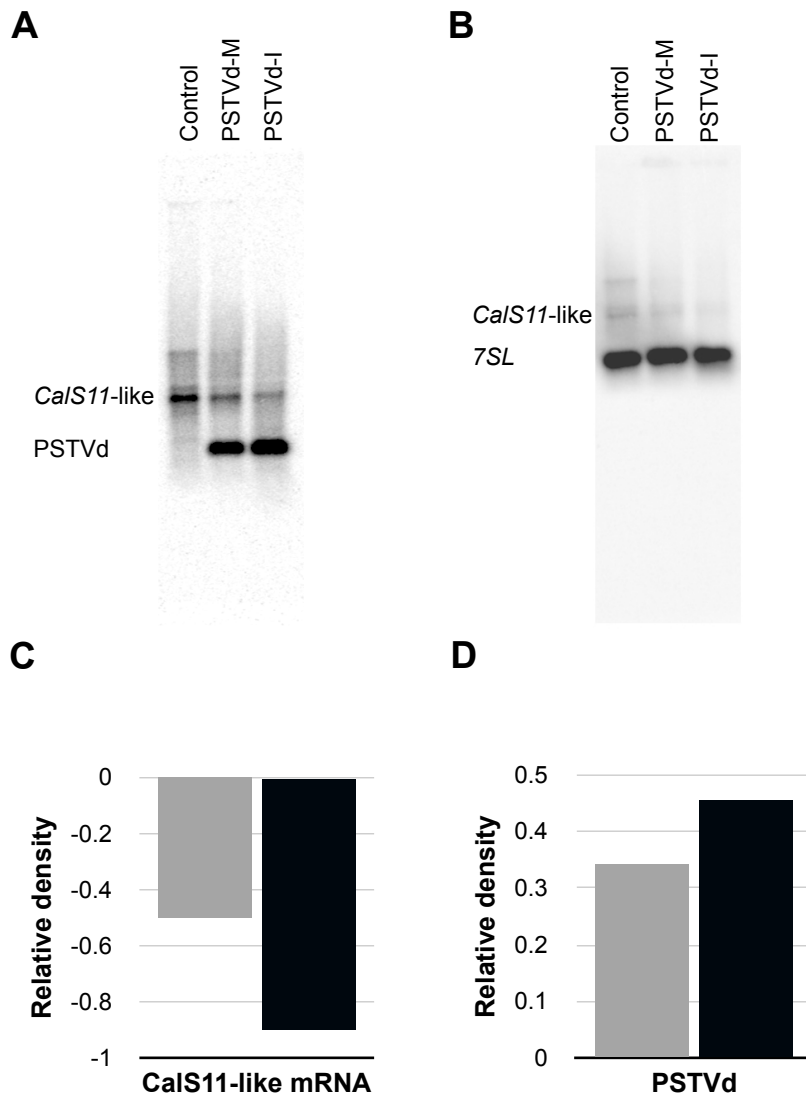

**Supplemental Figure 2.** RNA gel blot analysis of *CalS11-like* mRNA in PSTVd infected tomato plants.

Total RNA from plants infected with PSTVd-M or PSTVd-I was extracted at 14 dpi and subjected to RNA gel blot using probes against the **(A)** *CalS11-like* mRNA and PSTVd, or **(B)** the 7SL RNA as an internal control.  $\bar{U}^{\text{PSTVd}}$  blot signals for *CalS11-like* mRNA and PSTVd were quantified and expressed as relative densities in **(C)** and **(D)**, respectively.

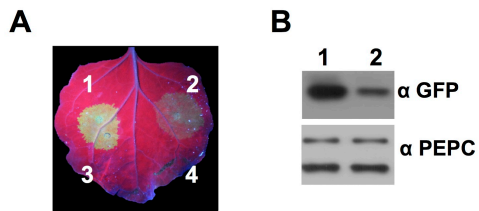

**Supplemental Figure 3.** Demonstration of feasibility of amiRNA technique.

**(A)** *N. benthamiana* leaves were agro-infiltrated with (1), empty pBIN61 vector plus GFP:UPF1; (2), amiR:UPF1 plus GFP:UPF1. Three dpi, leaves were photographed under UV illumination. **(B)** *N. benthamiana* leaves were agro-infiltrated with the same combination as in (A). Three dpi, total protein extracts were subjected to immune-blotting with anti-GFP (top panel) and anti-PEPC (lower panel) antibodies.

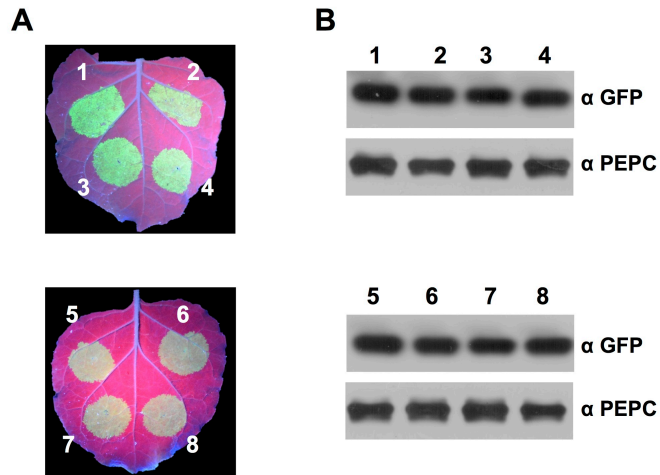

**Supplemental Figure 4.** Evaluation of effect of vd-sRNA:amiRNAs on GFP.

**(A)** *N. benthamiana* leaves were agro-infiltrated with pBIN61-GFP together with (1), empty pBIN61 vector (EV); (2), amiR:M39; (3), EV; (4), amiR:I39; (5), EV; (6), amiR:M40; (7), EV; (8), amiR:I40. At three dpi, leaves were photographed under UV illumination. **(B)** *N. benthamiana* leaves were agro-infiltrated with the same combinations as in (A). Three dpi, total protein extracts were subjected to immune-blotting with anti-GFP (top panel) and anti-PEPC (lower panel) antibodies.

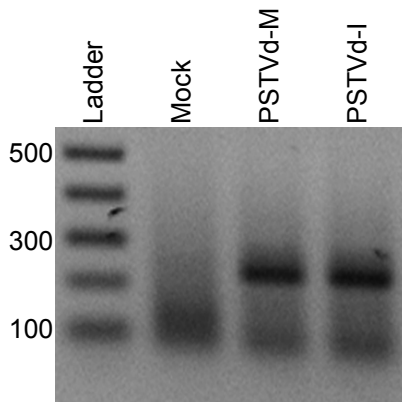

**Supplemental Figure 5.** 5' RLM-RACE products obtained with primers targeting the *Ca/S11-like* mRNA.

Total RNA was purified from mock-infected tomato plants, or plants infected with PSTVd-M or PSTVd-I, as indicated. Nested PCR products obtained from 5' RLM-RACE using primers targeting the *Ca/S11-like* mRNA were separated by 2.0% agarose gel electrophoresis.

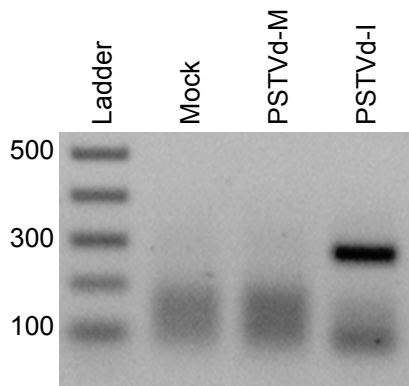

**Supplemental Figure 6.** 5' RLM-RACE products obtained with primers targeting the *Ca/S12-like* mRNA.

Total RNA was purified from mock-infected tomato plants, or plants infected with PSTVd-M or PSTVd-I, as indicated. Nested PCR products obtained from 5' RLM-RACE using primers targeting the *Ca/S12-like* mRNA were separated by 2.0% agarose gel electrophoresis.





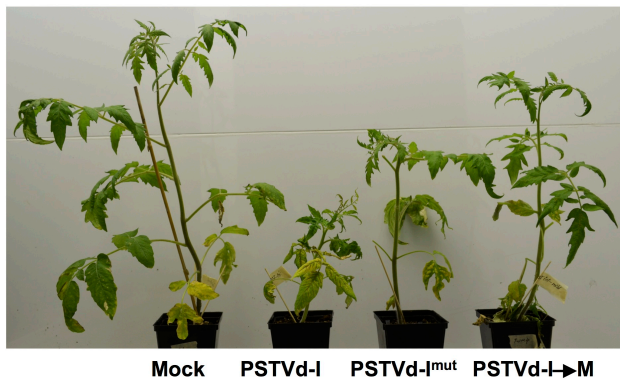

**Supplemental Figure 8.** Effect of PSTVd-I mutants on tomato plants at 21 dpi.

Tomato plants exhibiting symptoms after being mock inoculated or inoculated with the PSTVd-I mutants, PSTVd-I<sup>mut</sup> and PSTVd-I→M, as indicated at 21 dpi.

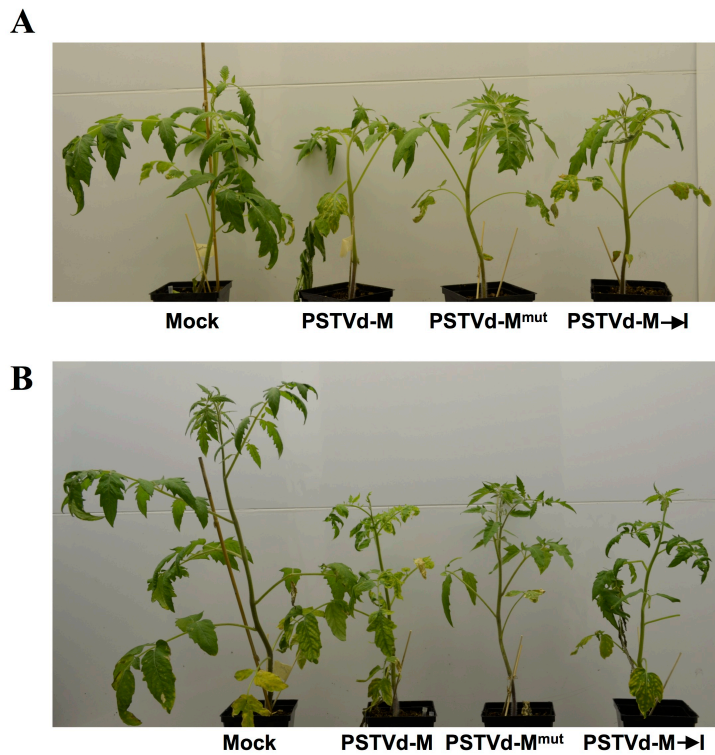

**Supplemental Figure 9.** Effect of PSTVd-M mutants on tomato plants at 14 and 21 dpi.

PSTVd-M mutants obtained by altering nucleotides from positions 47-50 (PSTVd-M<sup>mut</sup>) and by interchanging the VMRs (PSTVd-I→M) were inoculated onto tomato plants in order to analyze the effect of vd-sRNA on the phenotype. **(A)** and **(B)** show symptoms induced by PSTVd-M, PSTVd-M<sup>mut</sup> and PSTVd-M→I at 14 and 21 dpi, respectively, compared to mock-inoculated plants.

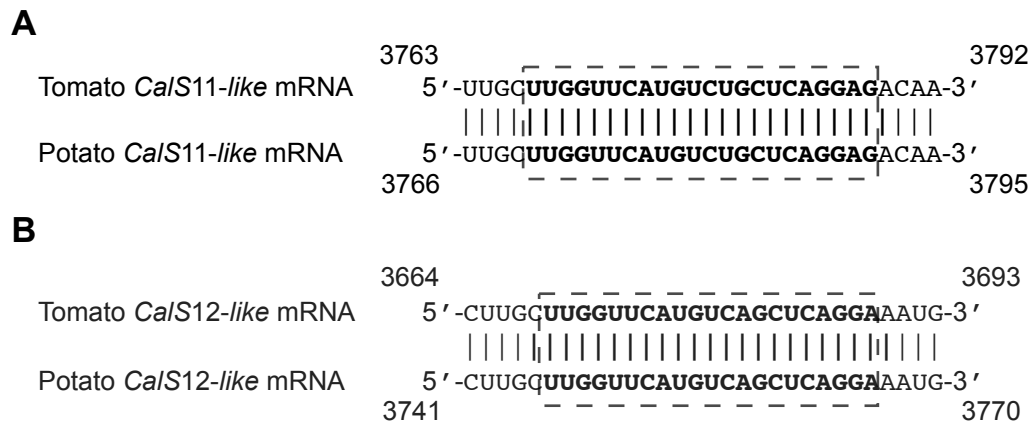

**Supplemental Figure 10.** Alignment of the PSTVd-sRNA binding sites of the tomato *Ca/S* genes against the potato *Ca/S* genes.

The sequences encompassing the PSTVd-sRNA binding sites of the tomato *Ca/S* genes were aligned against the potato *Ca/S* genes in order to determine the possibility of RISC-mediated degradation of this target by PSTVd-sRNA. Identical sequences were found at the vd-sRNA binding sites of **(A)** *Ca/S11-like* and **(B)** *Ca/S12-like*. Bold letters inside the box represent the target sequence.

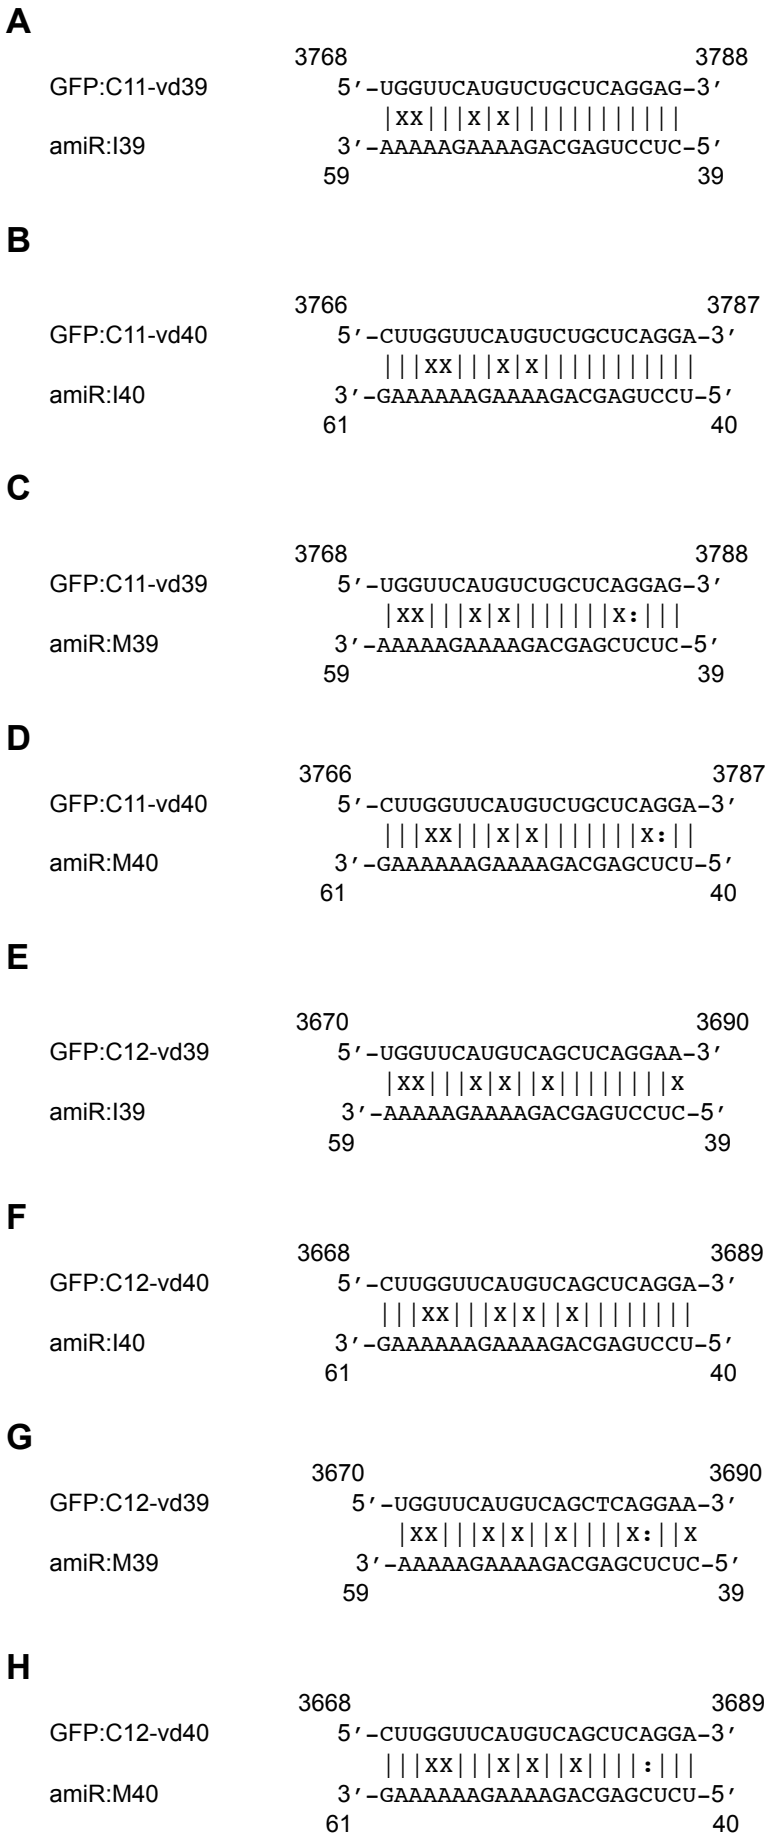

**Supplemental Figure 11.** Duplexes predicted to be formed by complexes of amiRNAs and GFP-expressing reporter constructs.

(A) amiR:I39 plus GFP:C11-vd39; (B) amiR:I40 plus GFP:C11-vd40; (C) amiR:M39 plus GFP:C11-vd39; (D) amiR:M40 plus GFP:C11-vd40; (E) amiR:I39 plus GFP:C12-vd39; (F) amiR:I40 plus GFP:C12-vd40; (G) amiR:M39 plus GFP:C12-vd39 and, (H) amiR:M40 plus GFP:C12-vd40.

**Supplemental Table 1.** Predicted duplex formation between tomato *CaIS11-like* mRNA targets and all possible vd-sRNA derived from the VMR of PSTVd variants.

| Viroid  | Position on viroid (nt) | <i>CaIS11</i> gene/vd-sRNA alignment                                                     | vd-sRNA binding site | $\Delta G$ | % pair |
|---------|-------------------------|------------------------------------------------------------------------------------------|----------------------|------------|--------|
| PSTVd-I | 39-59 (21)              | 5' -UGGUUCAUGUCUGCUCAGGAG-3'<br>3' -AAAAAGAAAAGACGAGUCCUC-5'<br>* *** * *****            | 3664-3684            | -27.9      | 80.9   |
|         | 39-60 (22)              | 5' -UUGGUUCAUGUCUGCUCAGGAG-3'<br>3' -AAAAAGAAAAGACGAGUCCUC-5'<br>** *** * *****          | 3663-3684            | -28.3      | 81.8   |
|         | 39-61 (23)              | 5' -CUUGGUUCAUGUCUGCUCAGGAG-3'<br>3' -GAAAAAGAAAAGACGAGUCCUC-5'<br>*** *** * *****       | 3662-3684            | -29.8      | 82.6   |
|         | 39-62 (24)              | 5' -GCUUGGUUCAUGUCUGCUCAGGAG-3'<br>3' -AGAAAAAGAAAAGACGAGUCCUC-5'<br>*** *** * *****     | 3661-3684            | -31.3      | 79.2   |
|         | 40-60 (21)              | 5' -UUGGUUCAUGUCUGCUCAGGA-3'<br>3' -AAAAAGAAAAGACGAGUCCU-5'<br>** *** * *****            | 3663-3683            | -26.4      | 80.9   |
|         | 40-61 (22)              | 5' -CUUGGUUCAUGUCUGCUCAGGA-3'<br>3' -GAAAAAGAAAAGACGAGUCCU-5'<br>*** *** * *****         | 3662-3683            | -27.8      | 81.8   |
|         | 40-62 (23)              | 5' -GCUUGGUUCAUGUCUGCUCAGGA-3'<br>3' -AGAAAAAGAAAAGACGAGUCCU-5'<br>*** *** * *****       | 3661-3683            | -29.4      | 78.3   |
|         | 40-63 (24)              | 5' -UGCUUGGUUCAUGUCUGCUCAGGA-3'<br>3' -AAGAAAAAGAAAAGACGAGUCCU-5'<br>* *** ** * *****    | 3660-3683            | -29.4      | 79.2   |
|         | 39-59 (21)              | 5' -UGGUUCAUGUCUGCUCAGGAG-3'<br>3' -AAAAAGAAAAGACGAGCUCUC-5'<br>* *** * ***** **         | 3664-3684            | -22.1      | 71.4   |
|         | 39-60 (22)              | 5' -UUGGUUCAUGUCUGCUCAGGAG-3'<br>3' -AAAAAGAAAAGACGAGCUCUC-5'<br>** *** * ***** **       | 3663-3684            | -22.5      | 72.7   |
| PSTVd-M | 39-61 (23)              | 5' -CUUGGUUCAUGUCUGCUCAGGAG-3'<br>3' -GAAAAAGAAAAGACGAGCUCUC-5'<br>*** *** * ***** **    | 3662-3684            | -23.9      | 73.9   |
|         | 39-62 (24)              | 5' -GCUUGGUUCAUGUCUGCUCAGGAG-3'<br>3' -AGAAAAAGAAAAGACGAGCUCUC-5'<br>*** *** * ***** **  | 3661-3684            | -25.5      | 70.8   |
|         | 40-60 (21)              | 5' -UUGGUUCAUGUCUGCUCAGGA-3'<br>3' -AAAAAGAAAAGACGAGCUCU-5'<br>** *** * ***** **         | 3663-3683            | -20.5      | 71.4   |
|         | 40-61 (22)              | 5' -CUUGGUUCAUGUCUGCUCAGGA-3'<br>3' -GAAAAAGAAAAGACGAGCUCU-5'<br>*** *** * ***** **      | 3662-3683            | -22.0      | 72.7   |
|         | 40-62 (23)              | 5' -GCUUGGUUCAUGUCUGCUCAGGA-3'<br>3' -AGAAAAAGAAAAGACGAGCUCU-5'<br>*** *** * ***** **    | 3661-3683            | -23.5      | 69.6   |
|         | 40-63 (24)              | 5' -UGCUUGGUUCAUGUCUGCUCAGGA-3'<br>3' -AAGAAAAAGAAAAGACGAGCUCU-5'<br>* *** ** * ***** ** | 3660-3683            | -23.5      | 70.8   |

**Supplemental Table 2.** Details of the primers used in the RT-qPCR reactions for the evaluation of both the PSTVd titer and the *callose synthase* gene expression.

| <b>Target</b>                                                | <b>Forward primer (5' -3')</b>              | <b>Reverse primer (5' -3')</b>        |
|--------------------------------------------------------------|---------------------------------------------|---------------------------------------|
| <i>Potato spindle tuber viroid</i> (PSTVd) <sup>a</sup>      | PSTVd-231F<br>(GCCCCCTTTGCGCTGT)            | PSTVd-296R<br>(AAGCGTTCTCGGGAGCTT)    |
| <i>CalS11-like</i> mRNA                                      | CalS-11F<br>(GAAGGACGAGAGAGAGATATGG)        | CalS-11R<br>(CTGAAGCAGAATCAAGGAACG)   |
| <i>CalS12-like</i> mRNA                                      | CalS-12F<br>(TGAGGAGGCACTGAAAATGAGG<br>AAC) | CalS-12R<br>(CGGATTTTCAGGGGTTGGCT)    |
| <i>Ubiquitin-conjugating enzyme (UBC)</i> <sup>b,c</sup>     | UBC-F<br>(GCAATCTTCTTCGATCCGGT)             | UBC-R (GCTACAGAACACCAAGCAGA)          |
| <i>Transducing/WD40 repeat family protein</i> <sup>b,c</sup> | WD40rfp-F<br>(ATAAGCTCCCTGGACACAC)          | WD40rfp-R<br>(CCTCACCTTCTTCTCAAATCTC) |
| <i>ARF-like GTPase family protein (ASAR1)</i> <sup>b,c</sup> | ASAR1-F<br>(GGAGGTGTTTATGTGCAGTATT)         | ASAR1-R<br>(CCAGACGGGAAAAAATAGTTGT)   |

<sup>a</sup>Boonham et al., 2005,

<sup>b</sup>Dekkers et al., 2012,

<sup>c</sup>house-keeping genes

**Supplemental Table 3.** Details of the primers used for constructing amiRNAs on the osa-MIR528 backbone.

| Osa-MIR528<br>amiRNA<br>construct | Name of<br>the<br>primer | Primer Sequence (5' -3')                                           |
|-----------------------------------|--------------------------|--------------------------------------------------------------------|
| <b>ami-UPF1</b>                   | U15F                     | tcttagactgtagcagcagcagTTTGAATTAACTGATGGGCCcaggagattc<br>agtttgaa   |
|                                   | U15R                     | gaggatccgcctagcagcaggaaCTTGAATTAACTGATGGGCTagagagg<br>caaaagttaa   |
| <b>amiR:I39</b>                   | PSTVd-I39-<br>59F        | tcttagactgtagcagcagcagCTCCTCAGCTGAAAAGAAAAAcaggagattc<br>agtttgaa  |
|                                   | PSTVd-I39-<br>59R        | gaggatccgcctagcagcaggaaCTCCTGAGCAGAAAAGAAAAAagagagg<br>caaaagttaa  |
| <b>amiR:I40</b>                   | PSTVd-I40-<br>61F        | tcttagactgtagcagcagcagTCCTGTGCACAAAAGAAAAAGcaggagat<br>tcagttgaa   |
|                                   | PSTVd-I40-<br>61R        | gaggatccgcctagcagcaggaaTCCTGAGCAGAAAAGAAAAAGagagagg<br>gcaaaagttaa |
| <b>amiR:M39</b>                   | PSTVd-<br>M39-59F        | tcttagactgtagcagcagcagCTCTCCAGCTGAAAAGAAAAAcaggagattc<br>agtttgaa  |
|                                   | PSTVd-<br>M39-59R        | gaggatccgcctagcagcaggaaCTCTCGAGCAGAAAAGAAAAAagagagg<br>caaaagttaa  |
| <b>amiR:M40</b>                   | PSTVd-<br>M40-61F        | tcttagactgtagcagcagcagTCTCGTGCACAAAAGAAAAAGcaggagat<br>tcagttgaa   |
|                                   | PSTVd-<br>M40-61R        | gaggatccgcctagcagcaggaaTCTCGAGCAGAAAAGAAAAAGagagagg<br>gcaaaagttaa |

*Bam*HI (ggatcc) and *Xba*I (tctaga) sites are used in PCR primers for cloning of amplified products into pCambia-1300.

Capital letters in the primers indicates amiRNA sequence of vd-sRNA.

<sup>a</sup>Modified from Yan et al., 2012

**Supplemental Table 4.** Oligonucleotides of the predicted target sequence of the *CalS11-like* mRNA used as inserts in to the binary vector pBIN61-GFP.

| Target | Construct        | Oligonucleotide 1 <sup>a</sup> (5' - 3') | Oligonucleotide 2 <sup>b</sup> (5' - 3') | amiRNA construct       |
|--------|------------------|------------------------------------------|------------------------------------------|------------------------|
| UPF1   | GFP:UPF1         | gatccCTTGAATTAAGCTG<br>TGGGCTc           | ccgggAGCCCATCAGTTTA<br>ATTCAAGg          | ami-UPF15 <sup>c</sup> |
|        | GFP:C11-<br>vd39 | gatccCTCCTGAGCAGACA<br>TGAACCAc          | ccgggTGGTTCATGTCTGC<br>TCAGGAGg          | amiR:M39,<br>amiR:I39  |
| CalS11 | GFP:C11-<br>vd40 | gatccTCCTGAGCAGACAT<br>GAACCAAGc         | ccgggCTTGGTTCATGTCT<br>GCTCAGGAg         | amiR:M40,<br>amiR:I40  |
|        | GFP:C12-<br>vd39 | gatccTTCCTGAGCTGACA<br>TGAACCAc          | ccgggTGGTTCATGTCAGC<br>TCAGGAAg          | amiR:M39,<br>amiR:I39  |
| CalS12 | GFP:C12-<br>vd40 | gatccTCCTGAGCTGACAT<br>GAACCAAGc         | ccgggCTTGGTTCATGTCA<br>GCTCAGGAg         | amiR:M40,<br>amiR:I40  |

<sup>a</sup> Lower case nucleotides at the 5' end of the oligonucleotide is similar to the *Bam*HI restricted site and a single nucleotide at the 3' end is similar to the product obtained after *Xma*I restriction digestion.

<sup>b</sup> Five nucleotides at 5' end of the is oligonucleotides are similar to the *Xma*I restriction enzyme digestion product whereas single nucleotide at 3' end is similar to the product obtained after *Bam*HI restriction digestion.

<sup>c</sup>Modified from Yan et al., 2012

Upper case nucleotide sequences in the oligonucleotide represent target nucleotides.



**Supplemental Table 5.** Details of the primers used for the 5' RLM-RACE experiment used to prove RISC-mediated cleavage site of the *CaIS11-like* mRNA.

| Primer name                   | Target gene                 | Primer sequence (5' -3')                          | Primer binding site               | Expected amplicon size (bp) |
|-------------------------------|-----------------------------|---------------------------------------------------|-----------------------------------|-----------------------------|
| RNA adapter <sup>a</sup>      |                             | GUUCAGAGUUCUACAGUCCGACG<br>AUC                    |                                   |                             |
| RACE For primer <sup>a</sup>  |                             | AATGATACGGCGACCACCGACAGG<br>TTCAGAGTTCTAC AGTCCGA | 5'- end of the<br>cleaved<br>mRNA |                             |
| RACE nFor primer <sup>a</sup> |                             | CCGACAGGTTTCAGAGTTCTAC                            |                                   |                             |
| CaIS11-RACE R                 | <i>CaIS11-</i><br>like mRNA | CATCCCTTCCCTTACCCACT                              | 4001-4020 <sup>b</sup>            | 252                         |
| CaIS11-RACE nR                |                             | GTGGGTAACATTGCCACCTC                              | 3967-3986 <sup>b</sup>            | 218                         |

<sup>a</sup>Navarro et al., 2012

<sup>b</sup>GenBank Acc. No. XM\_004232828

**Supplemental Table 6.** Predicted duplexes formed between the tomato *CaIS12-like* mRNA targets and all possible vd-sRNAs derived from the VMR of PSTVd variants.

| Viroid  | Position on viroid (nt) | <i>CaIS12</i> gene/vd-sRNA alignment                                                          | vd-sRNA binding site | $\Delta G$ | % pair |
|---------|-------------------------|-----------------------------------------------------------------------------------------------|----------------------|------------|--------|
| PSTVd-I | 39-59 (21)              | 5' -UGGUUCAUGUCAGCUCAGGAA-3'<br>3' -AAAAAGAAAAGACGAGCUCUC-5'<br>* *** * ** ***** **           | 3670-3690            | -22.0      | 71.4   |
|         | 39-60 (22)              | 5' -UUGGUUCAUGUCAGCUCAGGAA-3'<br>3' -AAAAAGAAAAGACGAGCUCUC-5'<br>** *** * ** ***** **         | 3669-3690            | -22.4      | 72.7   |
|         | 39-61 (23)              | 5' -CUUGGUUCAUGUCAGCUCAGGAA-3'<br>3' -GAAAAAGAAAAGACGAGCUCUC-5'<br>*** *** * ** ***** **      | 3668-3690            | -23.9      | 73.9   |
|         | 39-62 (24)              | 5' -GCUUGGUUCAUGUCAGCUCAGGAA-3'<br>3' -AGAAAAAGAAAAGACGAGCUCUC-5'<br>*** *** * ** ***** **    | 3667-3690            | -25.4      | 70.8   |
|         | 40-60 (21)              | 5' -UUGGUUCAUGUCAGCUCAGGA-3'<br>3' -AAAAAGAAAAGACGAGCUCUC-5'<br>** *** * ** ***** **          | 3669-3689            | -21.5      | 76.2   |
|         | 40-61 (22)              | 5' -CUUGGUUCAUGUCAGCUCAGGA-3'<br>3' -GAAAAAGAAAAGACGAGCUCUC-5'<br>*** *** * ** ***** **       | 3668-3689            | -22.9      | 77.3   |
|         | 40-62 (23)              | 5' -GCUUGGUUCAUGUCAGCUCAGGA-3'<br>3' -AGAAAAAGAAAAGACGAGCUCUC-5'<br>*** *** * ** ***** **     | 3667-3689            | -24.4      | 73.9   |
|         | 40-63 (24)              | 5' -UGCUUGGUUCAUGUCAGCUCAGGA-3'<br>3' -AAGAAAAAGAAAAGACGAGCUCUC-5'<br>* *** *** * ** ***** ** | 3666-3689            | -24.4      | 75     |
| PSTVd-M | 39-59 (21)              | 5' -UGGUUCAUGUCAGCUCAGGAA-3'<br>3' -AAAAAGAAAAGACGAGCUCUC-5'<br>* *** * ** ***** **           | 3670-3690            | -16.2      | 66.7   |
|         | 39-60 (22)              | 5' -UUGGUUCAUGUCAGCUCAGGAA-3'<br>3' -AAAAAGAAAAGACGAGCUCUC-5'<br>** *** * ** ***** **         | 3669-3690            | -16.6      | 68.2   |
|         | 39-61 (23)              | 5' -CUUGGUUCAUGUCAGCUCAGGAA-3'<br>3' -GAAAAAGAAAAGACGAGCUCUC-5'<br>*** *** * ** ***** **      | 3668-3690            | -18.0      | 69.6   |
|         | 39-62 (24)              | 5' -GCUUGGUUCAUGUCAGCUCAGGAA-3'<br>3' -AGAAAAAGAAAAGACGAGCUCUC-5'<br>*** *** * ** ***** **    | 3667-3690            | -19.6      | 66.7   |
|         | 40-60 (21)              | 5' -UUGGUUCAUGUCAGCUCAGGA-3'<br>3' -AAAAAGAAAAGACGAGCUCUC-5'<br>** *** * ** ***** **          | 3669-3689            | -15.6      | 66.7   |
|         | 40-61 (22)              | 5' -CUUGGUUCAUGUCAGCUCAGGA-3'<br>3' -GAAAAAGAAAAGACGAGCUCUC-5'<br>*** *** * ** ***** **       | 3668-3689            | -17.1      | 68.2   |
|         | 40-62 (23)              | 5' -GCUUGGUUCAUGUCAGCUCAGGA-3'<br>3' -AGAAAAAGAAAAGACGAGCUCUC-5'<br>*** *** * ** ***** **     | 3667-3689            | -18.6      | 65.2   |
|         | 40-63 (24)              | 5' -UGCUUGGUUCAUGUCAGCUCAGGA-3'<br>3' -AAGAAAAAGAAAAGACGAGCUCUC-5'<br>* *** *** * ** ***** ** | 3666-3689            | -18.6      | 66.7   |

**Supplemental Table 7.** Details of the primers used for the 5' RLM-RACE experiment used to prove the RISC-mediated cleavage site of the *CaIS12-like* mRNA.

| <b>Primer name</b> | <b>Primer sequence (5' -3')</b> | <b>Primer binding site<sup>a</sup></b> | <b>Expected amplicon size (bp)</b> |
|--------------------|---------------------------------|----------------------------------------|------------------------------------|
| CaIS12-RACE R      | CTTGTTCTCCATTGCCACTGG           | 3962-3982                              | 317                                |
| CaIS12-RACE nR     | CCCAACATCCCTTCCTTTGC            | 3908-3927                              | 262                                |

<sup>a</sup>GenBank Acc. No. XM\_004243304

**Supplemental Table 8.** Details of the oligonucleotides used to generate, by PCR, both PSTVd mutants and chimeric constructs.

| Primer                 | Sequence (5' -3')                                                                      | Remark                                                                                                                                   |
|------------------------|----------------------------------------------------------------------------------------|------------------------------------------------------------------------------------------------------------------------------------------|
| PSTVd-81F              | CAGGGATCCCCGGGAAACCTGGAG<br>CG                                                         | Forward primer                                                                                                                           |
| PSTVd-I <sup>mut</sup> | CCCGGGGATCCCTGAAGCGCTCCTCC<br>GAGCCGCTTCTTTTTCTTT <u>agacCTC</u><br>AGGAGGTC           | Nucleotide sequence of PSTVd-I is mutated at position 47-50. Used in combination of PSTVd-81F to obtain monomer PSTVd-I <sup>mut</sup> . |
| PSTVd-M <sup>mut</sup> | CCCGGGGATCCCTGAAGCGCTCCTCC<br>GAGCCGCCATTCTTTTTCTTT <u>agacCT</u><br>CGAGAGGTC         | Nucleotide sequence of PSTVd-M is mutated at position 47-50. Used in combination of PSTVd-81F to obtain monomer PSTVd-M <sup>mut</sup> . |
| PSTVd-I→M              | CCCGGGGATCCCTGAAGCGCTCCTCC<br>GAGCCGCTTCTTTTTCTTT <u>CTGCT</u><br><u>Cga</u> GAGGTC    | Nucleotide sequence of PSTVd-I is mutated at position 42 and 43. Used in combination of PSTVd-81F to obtain monomeric PSTVd-I→M.         |
| PSTVd-M→I              | CCCGGGGATCCCTGAAGCGCTCCTCC<br>GAGCCGCCATTCTTTTTCTTT <u>CTGCT</u><br><u>TCag</u> GAGGTC | Nucleotide sequence of PSTVd-M is mutated at position 42 and 43. Used in combination of PSTVd-81F to obtain monomeric PSTVd-M→I.         |

Bold letter indicate *Bam*HI endonuclease cleavage site.

Small letters indicates the mutated nucleotides.

Underlined letters indicates sRNA sequence.

**Supplemental Table 9.** Details of the oligonucleotides used to amplify, by PCR, the *CalS11-like* and *CalS12-like* mRNA of tomato.

| <b>Primer name</b>                  | <b>Primer sequence (5'-3')</b>                    | <b>Primer binding site</b> | <b>Target gene</b> |
|-------------------------------------|---------------------------------------------------|----------------------------|--------------------|
| <i>CalS11</i> -F                    | CAGAGGTGATGCAGTTCAAAC                             | 3599-3619 <sup>b</sup>     | <i>CalS11-like</i> |
| <i>CalS11</i> -RACE R <sup>a</sup>  | AATGATACGGCGACCACCGACAGG<br>TTCAGAGTTCTAC AGTCCGA | 4001-4020 <sup>b</sup>     |                    |
| <i>CalS11</i> -RACE nR <sup>a</sup> | CCGACAGGTTTCAGAGTTCTAC                            | 3967-3986 <sup>b</sup>     |                    |
| <i>CalS12</i> -F                    | CGTGGTGATGCAGTTCAGAC                              | 3502-3521 <sup>c</sup>     |                    |
| <i>CalS12</i> -RACE R <sup>a</sup>  | CTTGTTCTCCATTGCCACTGG                             | 3962-3982 <sup>c</sup>     |                    |
| <i>CalS12</i> -RACE nR <sup>a</sup> | CCCAACATCCCTTCCTTTGC                              | 3908-3927 <sup>c</sup>     |                    |

<sup>a</sup>Primers used for 5'-RLM RACE

<sup>b</sup>GenBank Acc. No. XM\_004232828

<sup>c</sup>GenBank Acc. No. XM\_004243304

### Supplemental Data References

- Boonham, N., Pérez, L.G., Mendez, M.S., Peralta, E.L., Blockley, A., Walsh, K., Barker, I., and Mumford, R.A.** (2005). Development of a real-time RT-PCR assay for the detection of Potato spindle tuber viroid. *J. Virol. Methods* **116**: 139-146.
- Dekkers, B.J., Willems, L., Bassel, G.W., van Bolderen-Veldkamp, R.P., Ligterink, W., Hilhorst, H.W., and Bentsink, L.** (2012). Identification of Reference Genes for RT-qPCR Expression analysis in Arabidopsis and tomato seeds. *Plant Cell Physiol.* **53**: 28-37.
- Navarro, B., Gisel, A., Rodio, M.E., Delgado, S., Flores, R., and Di Serio, F.** (2012). Small RNAs containing the pathogenic determinant of a chloroplast-replicating viroid guide the degradation of a host mRNA as predicted by RNA silencing. *Plant J.* **70**: 991-1003.
- Yan, F., Lu, Y., Wu, G., Peng, J., Zheng, H., Lin, L., and Chen, J.** (2012). A simplified method for constructing artificial microRNAs based on the osa-MIR528 precursor. *J. Biotechnol.* **160**: 146-150.
- Zuker, M.** (2003). Mfold web server for nucleic acid folding and hybridization prediction. *Nucleic Acids Res.* **31**: 3406–3415.
